# Supplementary material
Source: publisher figshare collection journal article supplement (https://frontiersin.figshare.com/ndownloader/files/14251106)
Supplement: Supplementary file [file 14251106]

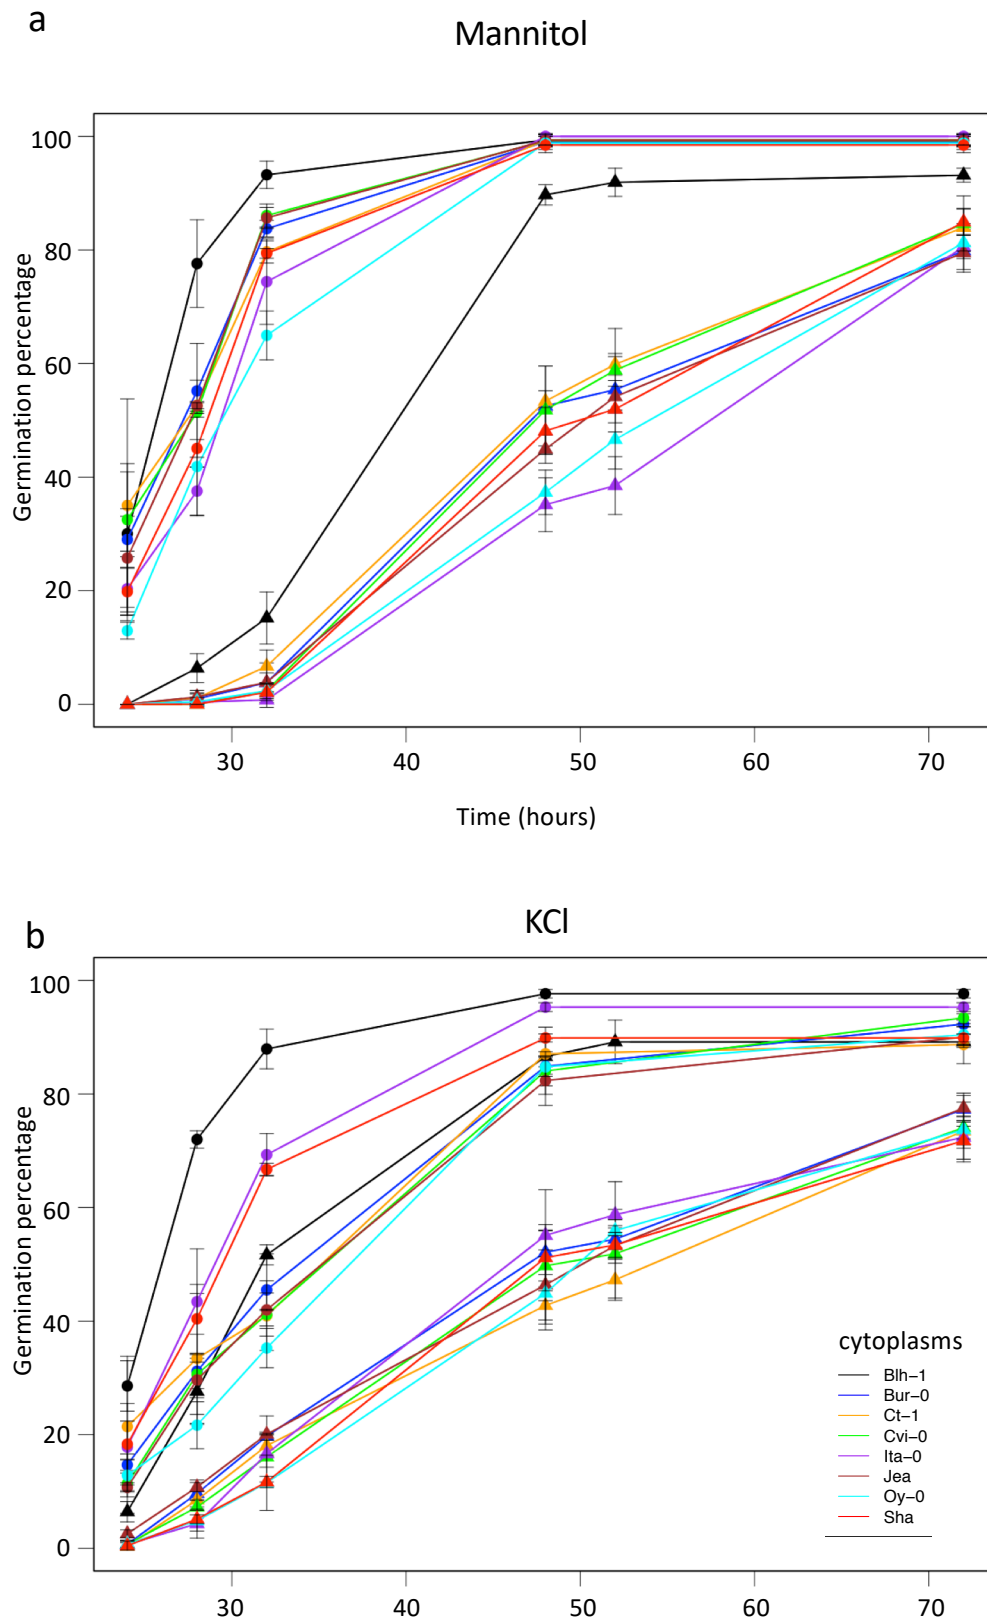

Fig. S6 Germination time curves of the Sha cytoline series on mannitol and KCl.

Germination kinetics of the cytolines, on water (dots) and on (a) 200mM mannitol or (b) 100 mM KCl (triangles). The colors of the graphs indicate the cytoplasm of the genotypes: black, Blh-1; blue, Bur-0; orange, Ct-1; green, Cvi-0; purple, Ita-0; brown, Jea; cyan, Oy-0; red, Sha. Error bars indicate the SD around the plotted mean for germination, from two replicates on water, and three replicates on treatment.
